# Supplementary material
Source: HighWire-hosted journal article supplement (https://bmjopenquality.bmj.com/content/5/1/u209185.w3747)
Supplement: inline-supplementary-material-3 [file inline-supplementary-material-3.xlsx]

## Sheet: Calculator
	COST SAVINGS CALCULATOR UNITED KINGDOM						Whilst this is an extremely useful tool, its ouput is dependent upon the input the operator gives. The sections on the left will require you in some cases to fill-in certain pieces of information which have been left blank on purpose for users to be able to calculate relative to their locality.
	PATIENTS
	BED DAY		Cost per day	No of days	Total
	Ward		500	0	0
	ITU		1000	0	0
					0
		Cost per Ix	No of Ix	No of days	Total		Investigation means any investigation of any type, e.g. urea & electrolytes, chest x-ray, urine. You need to know the cost per investigation. We have not supplied it as the unit cost can vary considerably. It is important to know how much it costs in your own clinical environment.
	INVESTIGATION(S)
	Albumin:creatinine ratio	2.41	19	4	183.16
	Enter Ix here	0	0	1	0
	To add investigation, add a new row above the last row				183.16
		Cost per Med	No of Med	No of days	Total		Medication means any medication of any type, e.g. fluids, anti-emetics, antibiotics, analgesia etc. You need to know the cost per medication. We have not supplied it as the unit cost can vary considerably depending on the manufacturer.
	MEDICATION(S)
	Enter Medication here	0	0	1	0
	Enter Medication here	0	0	1	0
	To add medication, add a new row above the last row				0
	DOCTOR
	TIME	Cost per hour	No of hours	No of days	Total
	F1	20	0	1	0
	F2	30	0	1	0
	Specialty Trainee	38	0	1	0
	Consultant	55	0.6	5	165
					165
	HC PROFESSIONAL (any healthcare professional other than a doctor)
	TIME	Cost per hour	No of hours	No of days	Total
	Lab technician (clinic)	20.5	1	5	102.5
	Lab technician (Ninewells main lab)	11.1	1	5	55.5
	To add professionals, add a new row above the last row				158
	WEEKLY SAVING				506.16		Take the blue number, go back to your workbook and insert it in there.
	ANNUAL SAVING				26320.3

## Sheet: Calculator Example
	COST SAVINGS CALCULATOR
	PATIENTS
	BED DAY		Cost per day	No of days	Total
	Ward		500	4	2000
	ITU		1000	0	0
					2000
		Cost per Ix	No of Ix	No of days	Total
	INVESTIGATION(S)
	Bone Profile	8	7	2	112
	Ultrasound Scan	250	2	1	500
	To add investigation, add a new row above the last row				612
		Cost per Med	No of Med	No of days	Total
	MEDICATION(S)
	Gentamicin	6.2	32	1	198.4
	Enter Medication here	0	0	1	0
	To add medication, add a new row above the last row				198.4
	DOCTOR
	TIME	Cost per hour	No of hours	No of days	Total
	HO	20	1	10	200
	SHO	30	1	10	300
	SpR	38	1	5	190
	Consultant	55	0	1	0
					690
	HC PROFESSIONAL (any healthcare professional other than a doctor)
	TIME	Cost per hour	No of hours	No of days	Total
	Physiotherapist	12	4	3	144
	Professional	0	0	1	0
	To add professionals, add a new row above the last row				144
	TOTAL SAVING				3644.4
